# Supplementary material
Source: PubMed Central journal article supplement (PMC11244756)
Supplement: NIHMS1908651-supplement-Supp_material.pdf [file NIHMS1908651-supplement-Supp_material.pdf]

Table S1

*Student and School Characteristics in Schools With and Without GSAs*

|                                               | Schools without GSAs<br>(2,118 schools) | Schools with GSAs<br>(523 schools) |
|-----------------------------------------------|-----------------------------------------|------------------------------------|
| <i>Student characteristics</i>                |                                         |                                    |
| Age <i>M (SD)</i>                             | 13.57 (1.79)                            | 15.39 (1.27)                       |
| Female (%)                                    | 50.14%                                  | 50.78%                             |
| Non-Hispanic white (%)                        | 19.29%                                  | 22.14%                             |
| LGBTQ (%)                                     | 17.41%                                  | 14.51%                             |
| <i>School characteristics</i>                 |                                         |                                    |
| Student body size <i>M (SD)</i>               | 1,079.36 (662.56)                       | 2,108.48 (724.67)                  |
| Percentage dropout <i>M (SD)</i>              | 5.55 (6.67)                             | 4.31 (3.96)                        |
| Years of teacher experience <i>M (SD)</i>     | 11.25 (3.08)                            | 11.76 (2.52)                       |
| Percentage of students of color <i>M (SD)</i> | 75.25 (22.53)                           | 72.38 (22.96)                      |

Table S2

*Standardized Beta Estimates for Multilevel Models of GSA Presence and School Functioning, Substance Use, and Mental Health*

| School climate | Grade s | Truanc y | Bullying sexual orientatio n | Alcohol lifetime | Smoking lifetime |
|----------------|---------|----------|------------------------------|------------------|------------------|
| $\beta$        | $\beta$ | $\beta$  | $\beta$                      | $\beta$          | $\beta$          |

GSA presence in the school

|                                            |        |   |        |         |         |         |
|--------------------------------------------|--------|---|--------|---------|---------|---------|
| GSA present                                | -      |   |        |         |         |         |
|                                            | .06**  | - |        |         |         |         |
|                                            | .02*   | * | .07*** | -.02*** | -.05*** | -.11*** |
| Racial/ethnic minority status <sup>a</sup> | -      |   |        |         |         |         |
|                                            | .09**  | - |        |         |         |         |
|                                            | .08*** | * | .02*** | .01***  | .02***  | .02***  |
| LGBTQ-status <sup>b</sup>                  | -      |   |        |         |         |         |
|                                            | .07**  | - |        |         |         |         |
|                                            | .09*** | * | .07*** | -.36*** | -.07*** | -.13*** |

---

Number of years GSA has been present in the school [min = 0.2, max = 15.7 years]

|                                            |        |   |        |         |         |         |
|--------------------------------------------|--------|---|--------|---------|---------|---------|
| Duration (# of years)                      | -      |   |        |         |         |         |
|                                            | .04**  |   |        |         |         |         |
|                                            | .00    | * | -.00*  | -.00*** | .00     | -.03*** |
| Racial/ethnic minority status <sup>a</sup> | -      |   |        |         |         |         |
|                                            | .10**  | - |        |         |         |         |
|                                            | .08*** | * | .02*** | .01***  | .03***  | .02***  |
| LGBTQ-status <sup>b</sup>                  | -      |   |        |         |         |         |
|                                            | .07**  | - |        |         |         |         |
|                                            | .09*** | * | .08*** | -.36*** | -.07*** | -.13*** |

---

*Note.* Total number of schools = 2,641 (895,218 students); number of schools with GSA = 523 (437,752

students). All models included student level: age and sex (0 = female, 1 = male), and school level: student body size, percentage dropout, teacher experience, and percentage of students of color. <sup>a</sup>0 = students of color, 1 = non-Hispanic white students <sup>b</sup>0 = LGBTQ students, 1 = heterosexual. \* $p < .05$ , \*\* $p < .005$ , \*\*\* $p < .001$ . Standardized betas are calculated from unstandardized regression estimates (Table 3), using formula from Hox (2010, p. 21).
